# Supplementary material for: Healthy Eating and Active Lifestyle After Bowel Cancer (HEAL ABC): feasibility randomised controlled trial protocol
Source: Springer Nature journal article supplement (doi:10.1186/s40814-020-00721-y), 2020-11-13
Supplement: 40814_2020_721_MOESM1_ESM.pdf [file 40814_2020_721_MOESM1_ESM.pdf]

## Sociodemographic questionnaire

Participant's number:

**Study title:** Healthy Eating and Active Lifestyle After Bowel Cancer

We would now like you to complete these questions that tell us about your background. These details will be kept confidential. If you do not wish to answer some of these questions you do not have to.

### Background Information

Please answer each question or tick the relevant box.

1. What is your age? *(Please add your age in years)*

 Years

2. What is your gender? *(Please tick one of the boxes)*

Female  Male  Transgender  Prefer not to say

3. What is your marital status? *(Please tick one of the boxes)*

Single  Living with partner  Married   
Separated/divorced  Widowed

4. What is your occupation (previous occupation if retired)?  
*(Please write on the line)*

-----  
5. What is the highest level of education you achieve?  
*(Please tick one of the boxes)*

No formal qualifications   
Trade qualification or NVQ   
GCSE level/or equivalent   
A Level/or equivalent   
Higher Education Diploma   
Degree/or equivalent   
Higher degree (MSc/PhD)

6. **What is your ethnic origin?** *(Please tick one of the boxes)*

British   
 Irish   
 Other   
Mixed  
 White & Black Caribbean   
 White & Black African   
 White & Asian   
 Other   
Chinese  
 Chinese

Black or black British

Caribbean   
 African   
 Other

Asian or Asian British

Indian   
 Pakistani   
 Bangladeshi   
 Other

Other Ethnic Group

Other

**7. What is the total income coming into your household each month?**

*(Please tick one of the boxes)*

Under £250       £251 to 500       £501 to 1000   
 £1001 to 2000       over £2000       Do not want to answer this question

**8. What are the first 3 or 4 digits of your post code?**

*(Please write in the boxes)*

**9. What is your smoking status?**

*(Please tick one of the boxes)*

Never smoked       Ex-smoker       Current smoker

**10. What supplements (e.g. vitamin D, iron, herbal supplements) do you use and how often?**

*(Please write on the lines)*

---



---



---



---



---

**Thank you very much for your answers.**
